# Supplementary material for: Description of conformational ensembles of disordered proteins by residue-local probabilities
Source: Royal Society of Chemistry journal article supplement (doi:10.1039/d2cp05970c), 2023-01-01
Supplement: d2cp05970c1.pdf [file d2cp05970c1.pdf]

which leads to the expression  
↓

$$P_{\text{mol}}^{(2)}(C_1 \dots C_N; R_1 \dots R_N) = P_1(C_1 | R_1 R_2) \cdot \prod_{i=2}^{N-1} P_i(C_i | C_{i-1}; R_{i-1} R_i R_{i+1}) \cdot P_N(C_N | C_{N-1}; R_{N-1} R_N)$$

(10a)

$$= P_1(C_1 | C_2; R_1 R_2) \cdot \prod_{i=2}^{N-1} P_i(C_i | C_{i+1}; R_{i-1} R_i R_{i+1}) \cdot P_N(C_N | R_{N-1} R_N)$$

(10b)
